# Supplementary material
Source: HighWire-hosted journal article supplement (https://gut.bmj.com/content/70/11/2105)
Supplement: inline-supplementary-material-2 [file inline-supplementary-material-2.pdf]

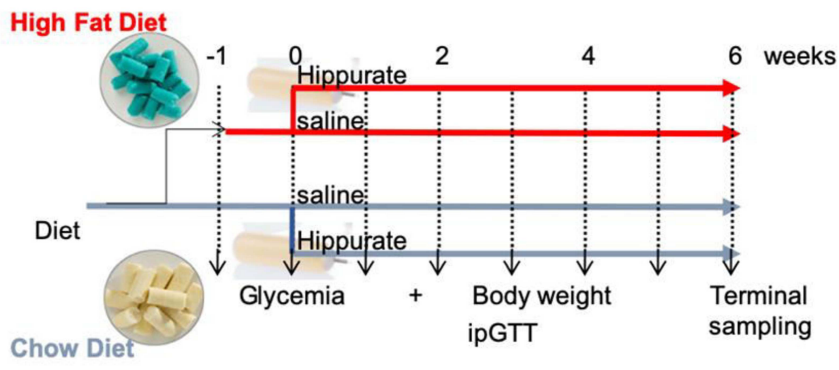

**Supplemental Figure 1**
