# Supplementary material
Source: HighWire-hosted journal article supplement (https://gut.bmj.com/content/70/11/2105)
Supplement: inline-supplementary-material-3 [file inline-supplementary-material-3.pdf]

**Supplementary Data 2.** Details of the formulation of the control diet (10% fat) (D12450Ki, Research Diets Inc. NJ) and the high fat diet (60% fat) (D12492i, Research Diets Inc. NJ) used to promote obesity in C57BL6J mice.

| <b>Control Diet</b>        | <b>D12450Ki</b>                      |              |
|----------------------------|--------------------------------------|--------------|
| <b>Caloric Information</b> |                                      |              |
| Protein                    | <b>20 % Kcal</b>                     |              |
| Fat                        | <b>10 % Kcal</b>                     |              |
| Carbohydrate               | <b>70 % Kcal</b>                     |              |
| Energy density             | <b>3.82 Kcal/g</b>                   |              |
| <b>Class description</b>   | <b>Ingredients</b>                   | <b>Grams</b> |
| Protein                    | Casein, Lactic, 30 Mesh              | 200.00 g     |
| Protein                    | Cystine, L                           | 3.00 g       |
| Carbohydrate               | Starch, Corn                         | 550.00 g     |
| Carbohydrate               | Lodex 10                             | 150.00 g     |
| Carbohydrate               | Sucrose, Fine Granulated             | 4.00 g       |
| Fiber                      | Solka Floc, FCC200                   | 50.00 g      |
| Fat                        | Soybean Oil, USP                     | 25.00 g      |
| Fat                        | Lard                                 | 20.00 g      |
| Mineral (See below)        | S10026B                              | 50.00 g      |
| Vitamin                    | Choline Bitartrate                   | 2.00 g       |
| Vitamin (See below)        | V10001C                              | 1.00 g       |
| Dye                        | Dye, Blue FD&C #1, Alum. Lake 35-42% | 0.03 g       |
| Dye                        | Dye, Red FD&C #40, Alum. Lake 35-42% | 0.03 g       |
|                            | Total:                               | 1055.05 g    |

**High Fat Diet D12492i****Caloric Information**

|                |             |
|----------------|-------------|
| Protein        | 20 % Kcal   |
| Fat            | 60 % Kcal   |
| Carbohydrate   | 20 % Kcal   |
| Energy density | 5.21 Kcal/g |

| <b>Class description</b> | <b>Ingredients</b>                   | <b>Grams</b> |
|--------------------------|--------------------------------------|--------------|
| Protein                  | Casein, Lactic, 30 Mesh              | 200.00 g     |
| Protein                  | Cystine, L                           | 3.00 g       |
| Carbohydrate             | Lodex 10                             | 125.00 g     |
| Carbohydrate             | Sucrose, Fine Granulated             | 72.80 g      |
| Fiber                    | Solka Floc, FCC200                   | 50.00 g      |
| Fat                      | Lard                                 | 245.00 g     |
| Fat                      | Soybean Oil, USP                     | 25.00 g      |
| Mineral (See below)      | S10026B                              | 50.00 g      |
| Vitamin                  | Choline Bitartrate                   | 2.00 g       |
| Vitamin (See below)      | V10001C                              | 1.00 g       |
| Dye                      | Dye, Blue FD&C #1, Alum. Lake 35-42% | 0.05 g       |
|                          | Total:                               | 773.85 g     |

*Mineral Mix (for 50g)*

|                                         |          |
|-----------------------------------------|----------|
| Mineral Potassium Citrate, Monohydrate  | 16.50 g  |
| Mineral Calcium Phosphate, Dibasic      | 13.00 g  |
| Mineral Calcium Carbonate, Light, USP   | 5.50 g   |
| Mineral Sodium Chloride                 | 2.59 g   |
| Mineral Magnesium Sulfate, Heptahydrate | 2.58 g   |
| Mineral Magnesium Oxide, Heavy, DC USP  | 0.42 g   |
| Mineral Ferric Citrate                  | 0.21 g   |
| Mineral Manganese Carbonate Hydrate     | 0.12 g   |
| Mineral Zinc Carbonate                  | 0.06 g   |
| Mineral Chromium Potassium Sulfate      | 0.02 g   |
| Mineral Copper Carbonate                | 0.01 g   |
| Mineral Ammonium Molybdate Tetrahydrate | 0.003 g  |
| Mineral Sodium Fluoride                 | 0.002 g  |
| Mineral Sodium Selenite                 | 0.0005 g |
| Mineral Potassium Iodate                | 0.0005 g |

*Vitamin Mix (for 1g)*

|                                |         |
|--------------------------------|---------|
| Vitamin Vitamin E Acetate, 50% | 0.100 g |
| Vitamin Niacin (a.k.a. B3)     | 0.030 g |

|                                                  |          |
|--------------------------------------------------|----------|
| Vitamin Biotin, 1%                               | 0.020 g  |
| Vitamin Pantothenic Acid, d, Calcium (a.k.a. B5) | 0.016 g  |
| Vitamin Vitamin D3, 100,000 IU/gm                | 0.010 g  |
| Vitamin Vitamin B12, 0.1% Mannitol               | 0.010 g  |
| Vitamin Vitamin A Acetate, 500,000 IU/gm         | 0.008 g  |
| Vitamin Pyridoxine HCl (a.k.a. B6)               | 0.007 g  |
| Vitamin Riboflavin (a.k.a. B2)                   | 0.006 g  |
| Vitamin Thiamine HCl (a.k.a. B1)                 | 0.006 g  |
| Vitamin Folic Acid                               | 0.002 g  |
| Vitamin Menadione Sodium Bisulfite               | 0.0008 g |
