# Supplementary material
Source: HighWire-hosted journal article supplement (https://gut.bmj.com/content/70/11/2105)
Supplement: inline-supplementary-material-22 [file inline-supplementary-material-22.pdf]

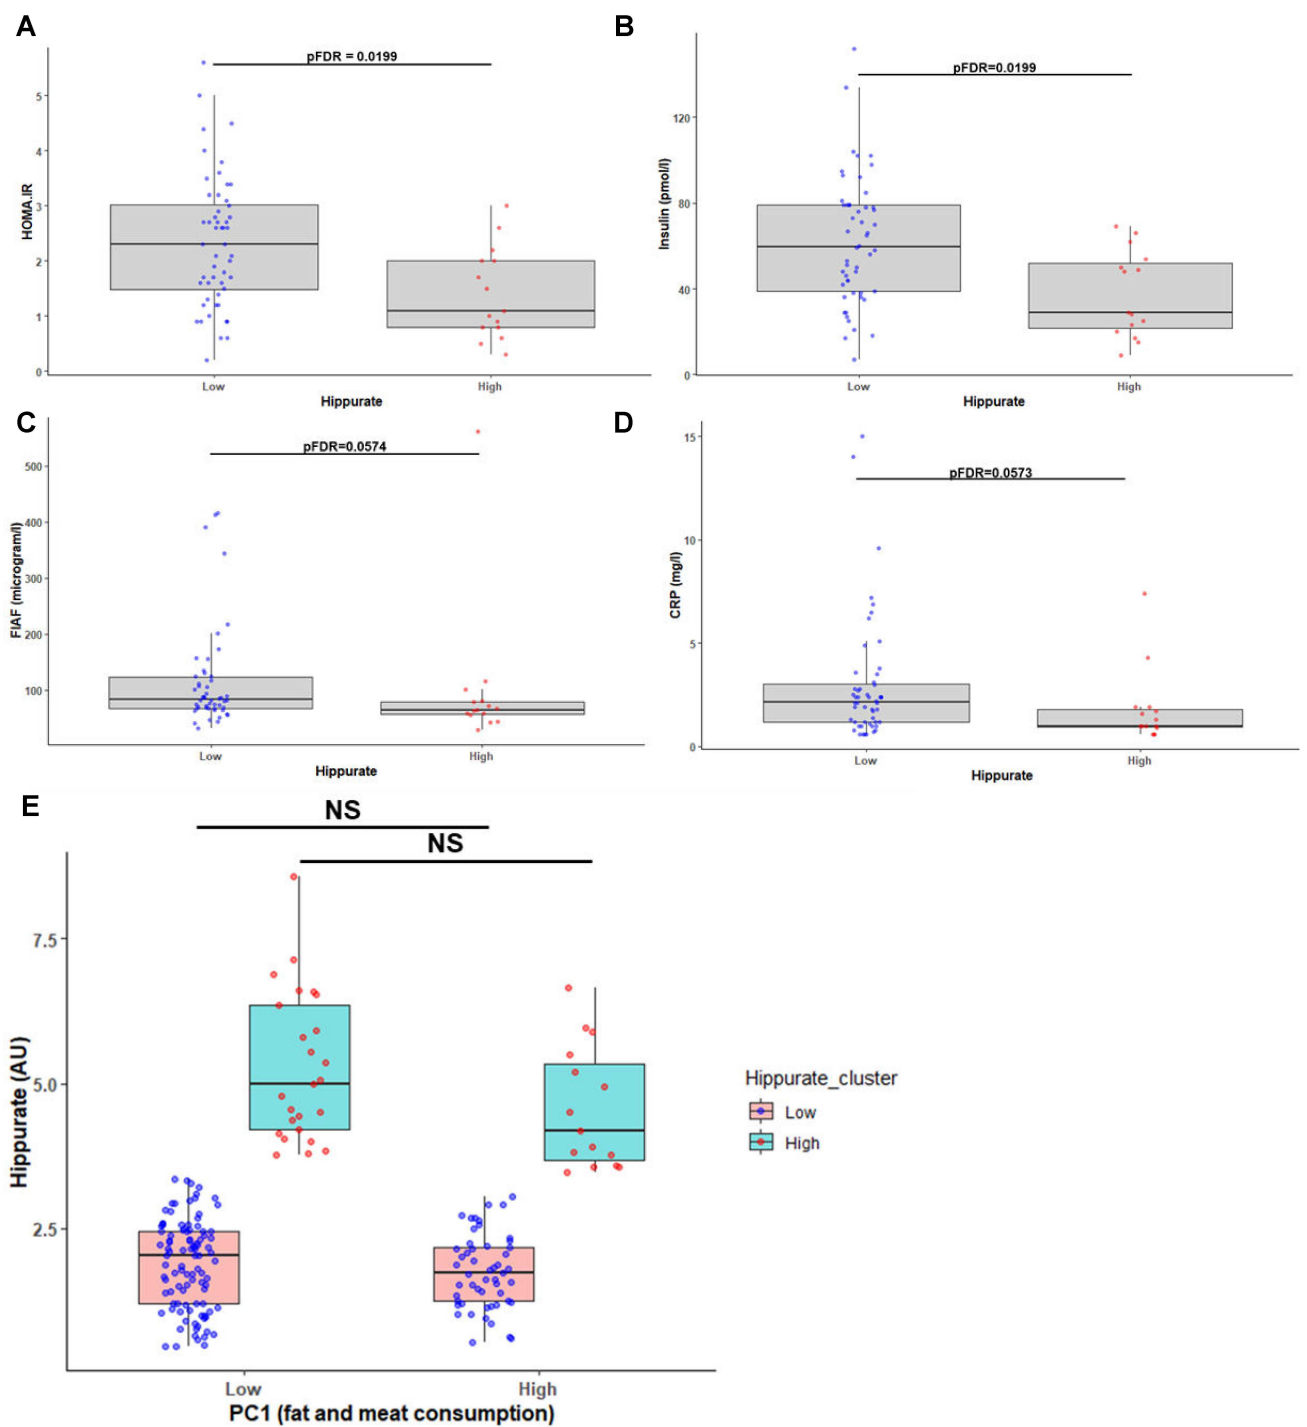

Supplemental Figure 9
